# Supplementary material for: Investigating Beliefs in Anti-Vax Conspiracy Theories among Medical Students
Source: MDPI journal article supplement (doi:10.3390/vaccines12040359), 2024-03-27
Supplement: s1 [file s1]

# Supplementary material

**Table S1. Students' support for anti-vaccine theories by year of study**

| Questions                                                                                                           | Year of study | Definitely/rather<br>not | Definitely/rather<br>yes | Do not know |
|---------------------------------------------------------------------------------------------------------------------|---------------|--------------------------|--------------------------|-------------|
| Vaccinations are an effective<br>form<br>of fighting infectious diseases                                            | 1             | 1 (0.9%)                 | 105 (96.3%)              | 3 (2.8%)    |
|                                                                                                                     | 2             | 4 (3.1%)                 | 127 (96.9%)              | n.s.        |
|                                                                                                                     | 3             | 1 (1.2%)                 | 80 (98.8%)               | n.s.        |
|                                                                                                                     | 4             | 2 (2.8%)                 | 69 (95.8%)               | 1 (1.4%)    |
|                                                                                                                     | 5             | n.s.                     | 27 (100%)                | n.s.        |
| Vaccines can cause autism                                                                                           | 1             | 104 (95.4%)              | 1 (0.9%)                 | 4 (3.7%)    |
|                                                                                                                     | 2             | 127 (96.9%)              | 1 (0.8%)                 | 3 (2.3%)    |
|                                                                                                                     | 3             | 80 (98.8%)               | n.s.                     | 1 (1.2%)    |
|                                                                                                                     | 4             | 70 (97.2%)               | n.s.                     | 2 (2.8%)    |
|                                                                                                                     | 5             | 27 (100%)                | n.s.                     | n.s.        |
| HPV vaccines cause infertility                                                                                      | 1             | 97 (89%)                 | n.s.                     | 12 (11%)    |
|                                                                                                                     | 2             | 123 (93.9%)              | 1 (0.8%)                 | 7 (5.3%)    |
|                                                                                                                     | 3             | 75 (92.6%)               | n.s.                     | 6 (7.4%)    |
|                                                                                                                     | 4             | 72 (100%)                | n.s.                     | n.s.        |
|                                                                                                                     | 5             | 26 (96.3%)               | 1 (3.7%)                 | n.s.        |
| mRNA vaccines can modify<br>the human genome                                                                        | 1             | 97 (89.0%)               | 4 (3.7%)                 | 8 (7.3%)    |
|                                                                                                                     | 2             | 121 (92.4%)              | 6 (4.6%)                 | 4 (3.1%)    |
|                                                                                                                     | 3             | 78 (96.3%)               | 1 (1.2%)                 | 2 (2.5%)    |
|                                                                                                                     | 4             | 71 (98.6%)               | 1 (1.4%)                 | n.s.        |
|                                                                                                                     | 5             | 25 (92.6%)               | 2 (7.4%)                 | n.s.        |
| Vaccinations against COVID-19<br>serve depopulation                                                                 | 1             | 103 (94.5%)              | 2 (1.8%)                 | 4 (3.7%)    |
|                                                                                                                     | 2             | 128 (97.7%)              | 1 (0.8%)                 | 2 (1.5%)    |
|                                                                                                                     | 3             | 81 (100%)                | n.s.                     | n.s.        |
|                                                                                                                     | 4             | 71 (98.6%)               | n.s.                     | 1 (1.4%)    |
|                                                                                                                     | 5             | 26 (96.3%)               | 1 (3.7%)                 | n.s.        |
| COVID-19 vaccinations<br>contain microchips                                                                         | 1             | 108 (99.1%)              | n.s.                     | 1 (0.9%)    |
|                                                                                                                     | 2             | 129 (98.5%)              | 1 (0.8%)                 | 1 (0.8%)    |
|                                                                                                                     | 3             | 81 (100%)                | n.s.                     | n.s.        |
|                                                                                                                     | 4             | 71 (98.6%)               | n.s.                     | 1 (1.4%)    |
|                                                                                                                     | 5             | 27 (100%)                | n.s.                     | n.s.        |
| The Zika, Ebola, MERS and<br>SARS-CoV-2 epidemics were<br>created to increase profits<br>by biotechnology companies | 1             | 94 (86.2%)               | 2 (1.8%)                 | 13 (11.9%)  |
|                                                                                                                     | 2             | 120 (91.6%)              | 3 (2.3%)                 | 8 (6.1%)    |
|                                                                                                                     | 3             | 76 (93.8%)               | 1 (1.2%)                 | 4 (4.9%)    |
|                                                                                                                     | 4             | 69 (95.8%)               | n.s.                     | 3 (4.2%)    |
|                                                                                                                     | 5             | 26 (96.3%)               | 1 (3.7%)                 | n.s.        |

Note: n.s. response not selected
